# Supplementary material
Source: publisher site journal article supplement (https://www.oncotarget.com/article/28631)
Supplement: Supplementary file 1 [file 28631]

## Addendum

## Addendum: Transfected SARS-CoV-2 spike DNA for mammalian cell expression inhibits p53 activation of p21(WAF1), TRAIL Death Receptor DR5 and MDM2 proteins in cancer cells and increases cancer cell viability after chemotherapy exposure

Shengliang Zhang<sup>1,2,3,4</sup> and Wafik S. El-Deiry<sup>1,2,3,4,5</sup>

<sup>1</sup>Laboratory of Translational Oncology and Experimental Cancer Therapeutics, Warren Alpert Medical School, Brown University, Providence, RI 02912, USA

<sup>2</sup>Department of Pathology and Laboratory Medicine, Warren Alpert Medical School, Brown University, Providence, RI 02912, USA

<sup>3</sup>Joint Program in Cancer Biology, Lifespan Health System and Brown University, Providence, RI 02912, USA

<sup>4</sup>Legorreta Cancer Center at Brown University, Providence, RI 02912, USA

<sup>5</sup>Hematology/Oncology Division, Department of Medicine, Lifespan Health System and Brown University, Providence, RI 02912, USA

**Published:**

**Copyright:** © 2024 Zhang and El-Deiry. This is an open access article distributed under the terms of the [Creative Commons Attribution License](#) (CC BY 4.0), which permits unrestricted use, distribution, and reproduction in any medium, provided the original author and source are credited.

**This article has an addendum:** This article received a publication fee waiver.

Original article: Oncotarget. 2024; 15:275–284. <https://doi.org/10.18632/oncotarget.28582>
